# Supplementary material for: The gastrointestinal fate of limonin and its effect on gut microbiota in mice
Source: Royal Society of Chemistry journal article supplement (doi:10.1039/c9fo01274e), 2019-01-01
Supplement: c9fo01274e1.pdf [file c9fo01274e1.pdf]

## Supplementary document

Table S1: General physiology and tissue weight of mice

| Group          | Body weight (g) | Liver (mg)       | Spleen (mg)    |
|----------------|-----------------|------------------|----------------|
| Control        | 39.08 ± 1.83    | 1922.58 ± 162.20 | 138.52 ± 17.77 |
| Limonin        | 40.32 ± 3.89    | 2032.70 ± 92.36  | 129.70 ± 7.01  |
| <i>p</i> value | 0.62            | 0.61             | 0.74           |

Table S2: Taxonomy of control and limonin-treated mouse fecal microbiota at phylum level.

Averages are presented as % relative abundance of the average total bacterial population per group.

| Taxon (phyla)    | Control |      | Limonin |      | <i>p</i> value |
|------------------|---------|------|---------|------|----------------|
|                  | Average | ±SD  | Average | ±SD  |                |
| Firmicutes       | 65.39   | 2.90 | 49.10   | 6.09 | 0.09           |
| Bacteroidetes    | 19.07   | 4.45 | 48.04   | 5.98 | 0.03           |
| Actinobacteria   | 13.82   | 4.01 | 1.24    | 0.10 | 0.03           |
| Verrucomicrobioa | 0.35    | 0.25 | 0.02    | 0.01 | 1.00           |
| TM7              | 0.06    | 0.02 | 0.14    | 0.08 | 1.00           |
| Proteobacteria   | 0.04    | 0.01 | 0.354   | 0.14 | 0.04           |
| Deferribacteres  | 0.01    | 0.00 | 0.02    | 0.01 | 1.00           |
| Tenericutes      | 0.01    | 0.01 | 0.01    | 0.01 | 1.00           |
| Unassigned       | 1.25    | 0.18 | 1.06    | 0.09 | 1.00           |

Table S3: Taxonomy of control and limonin-treated mouse fecal microbiota at genus level.

Averages are presented as % relative abundance of the average total bacterial population per group. Only relative abundances >0.01% bearing significant differences between groups were presented. Order, family, and genus denoted as o\_, f\_, and g\_ respectively. Unspecified families and genera identified as f\_\_ and g\_\_ respectively.

| Taxon (genus)               | Control |       | Limonin |      | <i>p</i> value |
|-----------------------------|---------|-------|---------|------|----------------|
|                             | Average | ±SD   | Average | ±SD  |                |
| <i>Lactobacillus</i>        | 43.99   | 13.17 | 10.67   | 5.66 | 0.00           |
| f_S24-7;g__                 | 16.32   | 8.00  | 33.53   | 8.53 | 0.01           |
| <i>Bifidobacterium</i>      | 13.03   | 8.96  | 0.04    | 0.02 | 0.01           |
| <i>Allobaculum</i>          | 8.48    | 1.29  | 0.00    | 0.00 | 0.00           |
| o_Clostridiales;f__;g__     | 3.29    | 3.93  | 14.38   | 8.76 | 0.03           |
| <i>Bacteroides</i>          | 2.05    | 1.91  | 11.76   | 4.55 | 0.00           |
| f_Lachnospiraceae;g__       | 0.53    | 0.50  | 3.22    | 1.91 | 0.02           |
| f_Rikenellaceae;g__         | 0.52    | 0.48  | 2.63    | 0.97 | 0.00           |
| <i>Streptococcus</i>        | 0.50    | 0.29  | 0.88    | 0.13 | 0.03           |
| <i>Oscillospira</i>         | 0.33    | 0.05  | 2.95    | 2.48 | 0.05           |
| <i>Ruminococcus</i>         | 0.29    | 0.31  | 4.82    | 0.97 | 0.00           |
| f_Erysipelotrichaceae;g__   | 0.18    | 0.11  | 0.65    | 0.28 | 0.01           |
| f_Peptostreptococcaceae;g__ | 0.12    | 0.13  | 0.00    | 0.00 | 0.02           |
| f_Ruminococcaceae;g__       | 0.05    | 0.08  | 0.44    | 0.35 | 0.04           |
| <i>Ruminococcus</i>         | 0.04    | 0.06  | 0.38    | 0.28 | 0.03           |
| <i>Dehalobacterium</i>      | 0.03    | 0.05  | 0.18    | 0.13 | 0.04           |
| f_Peptococcaceae;g__        | 0.01    | 0.01  | 0.14    | 0.09 | 0.02           |
| <i>Burkholderia</i>         | 0.01    | 0.00  | 0.03    | 0.01 | 0.00           |
| <i>Ralstonia</i>            | 0.01    | 0.00  | 0.02    | 0.00 | 0.01           |
| <i>Roseburia</i>            | 0.00    | 0.01  | 0.12    | 0.06 | 0.00           |
| f_Barnesiellaceae;g__       | 0.00    | 0.00  | 0.03    | 0.02 | 0.00           |
| <i>Candidatus</i>           | 0.00    | 0.00  | 0.02    | 0.01 | 0.01           |
